# Supplementary material
Source: Springer Nature journal article supplement (https://www.springermedizin.de/resource/supplementary/12876_2013_1091_MOESM5_ESM.pdf/9438422)

**Figure 1: Flow charts showing how the final samples analysed were obtained.**

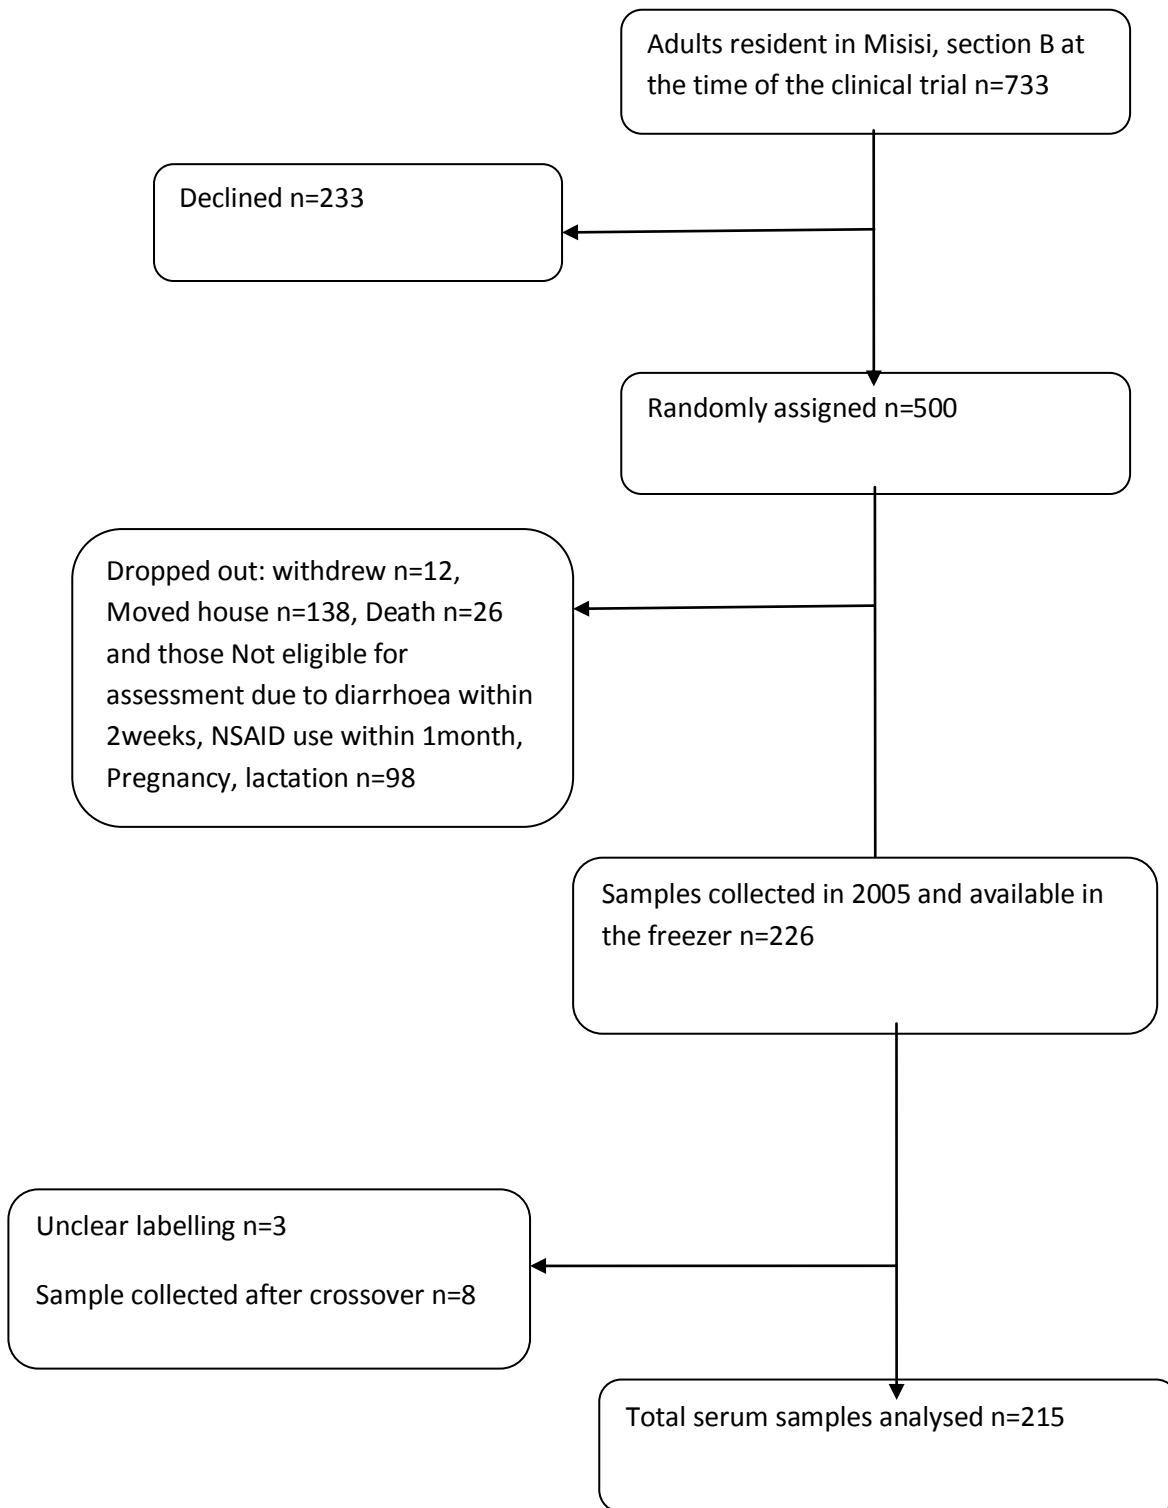

Supplement: MOESM5 [file 9438422]
